# Supplementary material for: Hyposensitive canopy conductance renders ecosystems vulnerable to extreme droughts
Source: Research Square preprint supplement (doi:10.21203/rs.3.rs-912317/v1), 2021-10-06
Supplement: Supplementary file 1 [file 58d957c1ca9e43be2aab1798.docx]

***Supplementary Material***

**Hyposensitive canopy conductance renders ecosystems vulnerable to extreme droughts**

Hang Xu1,2, Zhiqiang Zhang1,2*, Ram Oren3,4*, Xiaoyun Wu1,2

1 Jixian National Forest Ecosystem Observation and Research Station, CNERN, School of Soil and Water Conservation, Beijing Forestry University, Beijing 100083, China

2 Key Laboratory of Soil and Water Conservation & Desertification Combating, State Forestry and Grassland Administration, Beijing Forestry University, Beijing 100083, China

3 Nicholas School of the Environment & Pratt School of Engineering, Duke University, Durham, North Carolina, 27708, USA

4 Department of Forest Science, University of Helsinki, FI-00014, Finland

***Correspondence**

Zhiqiang Zhang, College of Soil and Water Conservation, Beijing Forestry University, Beijing, China. Tel: 0086-10-62336646 Email: zhqzhang@bjfu.edu.cn

Ram Oren, Nicholas School of the Environment & Pratt School of Engineering, Duke University, Durham, North Carolina, USA Tel: 001-919-6138032 Email: ramoren@duke.edu

Table S1. The information on the selected sites in this study. Site codes and names refer to the FLUXNET 2015 dataset. Latitude (Lat) and longitude (Long) are in decimal degrees. The Start and End indicate the first year and last year of the study period in each site, respectively. Other site information includes mean annual temperature (MAT, ℃), mean annual temperature (MAP, mm), and vegetation classification. The vegetation type is based on the International Global Biosphere Program (IGBP) classification scheme (DBF, deciduous broadleaved forest; ENF, evergreen needle-leaved forest; EBF, evergreen broadleaved forest; MF, mixed forest; OSH, open shrubland; CSH, closed shrubland; SAV, savanna; WSA, woody savanna; GRA, grassland; CRO, cropland).

| Site ID | Site_name | Lat | Long | Start | End | MAT | MAP | IGBP |
| --- | --- | --- | --- | --- | --- | --- | --- | --- |
| AR-SLu | San Luis | 0.69 | –66.46 | 2009 | 2011 | 19.7 | 361.0 | MF |
| AR-Vir | Virasoro | –28.24 | –56.19 | 2009 | 2012 | 21.6 | 1418.3 | ENF |
| AT-Neu | Neustift | 47.12 | 11.32 | 2002 | 2012 | 6.8 | 668.6 | GRA |
| AU-Ade | Adelaide River | –13.08 | 131.12 | 2007 | 2009 | 21.5 | 476.7 | WSA |
| AU-ASM | Alice Springs | –22.28 | 133.25 | 2010 | 2013 | 27.0 | 1359.5 | ENF |
| AU-Cpr | Calperum | –34.00 | 140.59 | 2010 | 2014 | 17.8 | 336.6 | SAV |
| AU-Cum | Cumberland Plain | –33.62 | 150.72 | 2012 | 2014 | 18.1 | 614.9 | EBF |
| AU-DaP | Daly River Savanna | –14.06 | 131.32 | 2007 | 2013 | 25.5 | 1373.3 | GRA |
| AU-DaS | Daly River Cleared | –14.16 | 131.39 | 2008 | 2014 | 26.6 | 1451.7 | SAV |
| AU-Dry | Dry River | –15.26 | 132.37 | 2008 | 2014 | 26.8 | 920.3 | SAV |
| AU-Emr | Emerald | –23.86 | 148.47 | 2011 | 2013 | 21.6 | 660.5 | GRA |
| AU-Fog | Fogg Dam | –12.55 | 131.31 | 2006 | 2008 | 25.5 | 1442.8 | WET |
| AU-Gin | Gingin | –31.38 | 115.71 | 2011 | 2014 | 19.9 | 364.8 | WSA |
| AU-GWW | Great Western Woodlands, Western Australia, Australia | –30.19 | 120.65 | 2013 | 2014 | 19.2 | 620.1 | SAV |
| AU-How | Howard Springs | –12.49 | 131.15 | 2001 | 2014 | 26.7 | 1715.4 | WSA |
| AU-Lox | Loxton | –34.47 | 140.66 | 2008 | 2009 | 17.0 | 161.1 | DBF |
| AU-RDF | Red Dirt Melon Farm, Northern Territory | –14.56 | 132.48 | 2011 | 2013 | 26.2 | 1430.3 | WSA |
| AU-Rig | Riggs Creek | –36.65 | 145.58 | 2011 | 2014 | 15.6 | 445.0 | GRA |
| AU-Rob | Robson Creek, Queensland, Australia | –17.12 | 145.63 | 2014 | 2014 | 21.7 | 2193.8 | EBF |
| AU-Stp | Sturt Plains | –17.15 | 133.35 | 2008 | 2014 | 26.1 | 728.5 | GRA |
| AU-TTE | Ti Tree East | –22.29 | 133.64 | 2012 | 2013 | 24.8 | 284.4 | OSH |
| AU-Tum | Tumbarumba | –35.66 | 148.15 | 2001 | 2014 | 9.5 | 963.2 | EBF |
| AU-Wac | Wallaby Creek | –37.43 | 145.19 | 2005 | 2008 | 10.7 | 2775.3 | EBF |
| AU-Whr | Whroo | –36.67 | 145.03 | 2011 | 2014 | 15.7 | 389.0 | EBF |
| AU-Wom | Wombat | –37.42 | 144.09 | 2010 | 2012 | 11.1 | 1217.9 | EBF |
| AU-Ync | Jaxa | –34.99 | 146.29 | 2012 | 2014 | 17.3 | 692.3 | GRA |
| BE-Bra | Brasschaat | 51.31 | 4.52 | 1996 | 2014 | 10.7 | 813.6 | MF |
| BE-Lon | Lonzee | 50.55 | 4.75 | 2004 | 2014 | 11.4 | 766.3 | CRO |
| BE-Vie | Vielsalm | 50.31 | 6.00 | 1996 | 2014 | 8.3 | 951.9 | MF |
| BR-Sa3 | Santarem-Km83-Logged Forest | –3.02 | –54.97 | 2000 | 2004 | 25.8 | 1474.6 | EBF |
| CA-Man | Manitoba - Northern Old Black Spruce (former BOREAS Northern Study Area) | 55.88 | –98.48 | 1994 | 2008 | -1.1 | 326.1 | ENF |
| CA-NS1 | UCI-1850 burn site | 55.88 | –98.48 | 2001 | 2005 | 0.9 | 284.1 | ENF |
| CA-NS2 | UCI-1930 burn site | 55.91 | –98.52 | 2001 | 2005 | -2.7 | 321.1 | ENF |
| CA-NS3 | UCI-1964 burn site | 55.91 | –98.38 | 2001 | 2005 | -2.2 | 197.3 | ENF |
| CA-NS4 | UCI-1964 burn site wet | 55.91 | –98.38 | 2002 | 2005 | -1.4 | 274.7 | ENF |
| CA-NS5 | UCI-1981 burn site | 55.86 | –98.49 | 2001 | 2005 | -1.8 | 288.9 | ENF |
| CA-NS6 | UCI-1989 burn site | 55.92 | –98.96 | 2001 | 2005 | -0.4 | 254.7 | OSH |
| CA-NS7 | UCI-1998 burn site | 56.64 | –99.95 | 2002 | 2005 | -1.7 | 302.1 | OSH |
| CA-Qfo | Quebec - Eastern Boreal, Mature Black Spruce | 49.69 | –74.34 | 2003 | 2010 | 1.0 | 945.9 | ENF |
| CA-SF1 | Saskatchewan - Western Boreal, forest burned in 1977 | 54.49 | –105.82 | 2003 | 2006 | -0.1 | 447.8 | ENF |
| CA-SF2 | Saskatchewan - Western Boreal, forest burned in 1989 | 54.25 | –105.88 | 2001 | 2005 | 0.2 | 286.2 | ENF |
| CA-SF3 | Saskatchewan - Western Boreal, forest burned in 1998 | 54.09 | –106.01 | 2001 | 2006 | 1.2 | 353.5 | OSH |
| CH-Cha | Chamau | 47.21 | 8.41 | 2005 | 2014 | 9.5 | 1135.8 | GRA |
| CH-Dav | Davos | 46.82 | 9.86 | 1997 | 2014 | 3.5 | 841.7 | ENF |
| CH-Fru | Früebüel | 47.12 | 8.54 | 2005 | 2014 | 7.6 | 1295.2 | GRA |
| CH-Lae | Laegern | 47.48 | 8.37 | 2004 | 2014 | 7.8 | 1175.2 | MF |
| CH-Oe1 | Oensingen grassland | 47.29 | 7.73 | 2002 | 2008 | 9.3 | 1222.0 | GRA |
| CH-Oe2 | Oensingen crop | 47.29 | 7.73 | 2004 | 2014 | 9.6 | 2063.5 | CRO |
| CN-Cha | Changbaishan | 42.40 | 128.10 | 2003 | 2005 | 4.4 | 466.1 | MF |
| CN-Cng | Changling | 44.59 | 123.51 | 2007 | 2010 | 6.2 | 289.2 | GRA |
| CN-Dan | Dangxiong | 30.50 | 91.07 | 2004 | 2005 | 2.2 | 520.2 | GRA |
| CN-Din | Dinghushan | 23.17 | 112.54 | 2003 | 2005 | 20.4 | 1373.5 | EBF |
| CN-Du2 | Duolun_grassland (D01) | 42.05 | 116.28 | 2006 | 2008 | 3.2 | 331.6 | GRA |
| CN-Ha2 | Haibei Shrubland | 37.61 | 101.33 | 2003 | 2005 | -1.5 | 527.0 | WET |
| CN-HaM | Haibei Alpine Tibet site | 37.37 | 101.18 | 2002 | 2004 | -1.0 | 595.1 | GRA |
| CN-Qia | Qianyanzhou | 26.74 | 115.06 | 2003 | 2005 | 18.2 | 1169.9 | ENF |
| CN-Sw2 | Siziwang Grazed (SZWG) | 41.79 | 111.90 | 2010 | 2012 | 2.4 | 280.7 | GRA |
| CZ-BK1 | Bily Kriz forest | 49.50 | 18.54 | 2004 | 2008 | 6.9 | 1561.8 | ENF |
| CZ-BK2 | Bily Kriz grassland | 49.49 | 18.54 | 2004 | 2006 | 5.5 | 1533.7 | GRA |
| CZ-wet | Trebon (CZECHWET) | 49.02 | 14.77 | 2006 | 2014 | 8.4 | 605.9 | WET |
| DE-Akm | Anklam | 53.87 | 13.68 | 2009 | 2014 | 9.2 | 648.3 | WET |
| DE-Geb | Gebesee | 51.10 | 10.91 | 2001 | 2014 | 9.7 | 531.5 | CRO |
| DE-Gri | Grillenburg | 50.95 | 13.51 | 2004 | 2014 | 8.6 | 943.1 | GRA |
| DE-Hai | Hainich | 51.08 | 10.45 | 2000 | 2012 | 8.3 | 761.5 | DBF |
| DE-Kli | Klingenberg | 50.89 | 13.52 | 2004 | 2014 | 7.8 | 811.3 | CRO |
| DE-Lkb | Lackenberg | 49.10 | 13.30 | 2009 | 2013 | 4.6 | 1113.2 | ENF |
| DE-Obe | Oberbärenburg | 50.79 | 13.72 | 2008 | 2014 | 6.5 | 1046.4 | ENF |
| DE-RuR | Rollesbroich | 50.62 | 6.30 | 2011 | 2014 | 8.2 | 871.9 | GRA |
| DE-RuS | Selhausen Juelich | 50.87 | 6.45 | 2011 | 2014 | 10.8 | 550.9 | CRO |
| DE-Seh | Selhausen | 50.87 | 6.45 | 2007 | 2010 | 10.3 | 574.2 | CRO |
| DE-SfN | Schechenfilz Nord | 47.81 | 11.33 | 2012 | 2014 | 8.3 | 930.4 | WET |
| DE-Spw | Spreewald | 51.89 | 14.03 | 2010 | 2014 | 10.5 | 641.8 | WET |
| DE-Tha | Tharandt | 50.96 | 13.57 | 1996 | 2014 | 8.8 | 842.0 | ENF |
| DK-Fou | Foulum | 56.48 | 9.59 | 2005 | 2005 | 8.2 | 643.3 | CRO |
| DK-NuF | Nuuk Fen | 64.13 | –51.39 | 2008 | 2014 | -0.1 | 944.9 | WET |
| DK-Sor | Soroe | 55.49 | 11.64 | 1996 | 2014 | 8.3 | 848.9 | DBF |
| DK-ZaF | Zackenberg Fen | 74.48 | –20.55 | 2008 | 2011 | -9.2 | 185.3 | WET |
| DK-ZaH | Zackenberg Heath | 74.47 | –20.55 | 2000 | 2014 | -8.8 | 160.7 | GRA |
| ES-LgS | Laguna Seca | 37.10 | –2.97 | 2007 | 2009 | 6.2 | 515.8 | OSH |
| ES-Ln2 | Lanjaron-Salvage logging | 36.97 | –3.48 | 2009 | 2009 | 9.1 | 546.3 | OSH |
| FI-Hyy | Hyytiala | 61.85 | 24.29 | 1996 | 2014 | 4.4 | 604.0 | ENF |
| FI-Jok | Jokioinen | 60.90 | 23.51 | 2000 | 2003 | 4.6 | 622.0 | CRO |
| FI-Lom | Lompolojankka | 68.00 | 24.21 | 2007 | 2009 | -0.1 | 535.1 | WET |
| FI-Sod | Sodankyla | 67.36 | 26.64 | 2001 | 2014 | 0.7 | 529.1 | ENF |
| FR-Fon | Fontainebleau-Barbeau | 48.48 | 2.78 | 2005 | 2014 | 11.4 | 684.8 | DBF |
| FR-Gri | Grignon | 48.84 | 1.95 | 2004 | 2013 | 11.0 | 586.7 | CRO |
| FR-LBr | Le Bray | 44.72 | –0.77 | 1996 | 2008 | 13.4 | 920.2 | ENF |
| FR-Pue | Puechabon | 43.74 | 3.60 | 2000 | 2014 | 13.8 | 921.7 | EBF |
| GF-Guy | Guyaflux (French Guiana) | 5.28 | –52.92 | 2004 | 2014 | 25.6 | 3110.5 | EBF |
| IT-BCi | Borgo Cioffi | 40.52 | 14.96 | 2004 | 2014 | 17.9 | 1198.9 | CRO |
| IT-CA1 | Castel d'Asso1 | 42.38 | 12.03 | 2011 | 2014 | 15.0 | 767.6 | DBF |
| IT-CA2 | Castel d'Asso2 | 42.38 | 12.03 | 2011 | 2014 | 14.8 | 767.6 | CRO |
| IT-CA3 | Castel d'Asso 3 | 42.38 | 12.02 | 2011 | 2014 | 14.8 | 708.6 | DBF |
| IT-Col | Collelongo | 41.85 | 13.59 | 1996 | 2014 | 7.2 | 1178.6 | DBF |
| IT-Cp2 | Castelporziano2 | 41.70 | 12.36 | 2012 | 2014 | 16.1 | 852.1 | EBF |
| IT-Cpz | Castelporziano | 41.71 | 12.38 | 1997 | 2009 | 15.1 | 815.9 | EBF |
| IT-Isp | Ispra ABC-IS | 45.81 | 8.63 | 2013 | 2014 | 13.4 | 2001.1 | DBF |
| IT-La2 | Lavarone2 | 45.95 | 11.29 | 2000 | 2002 | 7.1 | 1490.1 | ENF |
| IT-Lav | Lavarone | 45.96 | 11.28 | 2003 | 2014 | 7.0 | 1283.4 | ENF |
| IT-MBo | Monte Bondone | 46.01 | 11.05 | 2003 | 2013 | 5.2 | 974.0 | GRA |
| IT-Noe | Arca di Noe - Le Prigionette | 40.61 | 8.15 | 2004 | 2014 | 16.4 | 570.7 | CSH |
| IT-PT1 | Parco Ticino forest | 45.20 | 9.06 | 2002 | 2004 | 14.0 | 781.7 | DBF |
| IT-Ren | Renon | 46.59 | 11.43 | 1998 | 2013 | 4.6 | 915.7 | ENF |
| IT-Ro1 | Roccarespampani 1 | 42.41 | 11.93 | 2000 | 2008 | 15.6 | 811.0 | DBF |
| IT-Ro2 | Roccarespampani 2 | 42.39 | 11.92 | 2002 | 2012 | 15.5 | 792.4 | DBF |
| IT-SR2 | San Rossore 2 | 43.73 | 10.29 | 2013 | 2014 | 15.5 | 1328.7 | ENF |
| IT-SRo | San Rossore | 43.73 | 10.28 | 1999 | 2012 | 15.2 | 877.9 | ENF |
| IT-Tor | Torgnon | 45.84 | 7.58 | 2008 | 2014 | 2.9 | 767.8 | GRA |
| JP-MBF | Moshiri Birch Forest Site | 44.39 | 142.32 | 2003 | 2005 | 3.6 | 934.7 | DBF |
| JP-SMF | Seto Mixed Forest Site | 35.26 | 137.08 | 2002 | 2006 | 14.7 | 1534.0 | MF |
| NL-Hor | Horstermeer | 52.24 | 5.07 | 2004 | 2011 | 10.6 | 1035.2 | GRA |
| NL-Loo | Loobos | 52.17 | 5.74 | 1996 | 2013 | 10.0 | 856.3 | ENF |
| NO-Adv | Adventdalen | 78.19 | 15.92 | 2011 | 2014 | -4.1 | 158.0 | WET |
| RU-Che | Cherski | 68.61 | 161.34 | 2002 | 2005 | -11.0 | 96.7 | WET |
| RU-Cok | Chokurdakh | 70.83 | 147.49 | 2003 | 2014 | -12.6 | 217.8 | OSH |
| RU-Fyo | Fyodorovskoye | 56.46 | 32.92 | 1998 | 2014 | 5.2 | 568.8 | ENF |
| RU-Ha1 | Hakasia steppe | 54.73 | 90.00 | 2002 | 2004 | 2.0 | 383.7 | GRA |
| SD-Dem | Demokeya | 13.28 | 30.48 | 2005 | 2009 | 27.4 | 284.9 | SAV |
| SN-Dhr | Dahra | 15.40 | –15.43 | 2010 | 2013 | 28.3 | 275.9 | SAV |
| US-AR1 | ARM USDA UNL OSU Woodward Switchgrass 1 | 36.43 | –99.42 | 2009 | 2012 | 15.3 | 508.6 | GRA |
| US-AR2 | ARM USDA UNL OSU Woodward Switchgrass 2 | 36.64 | –99.60 | 2009 | 2012 | 15.1 | 411.9 | GRA |
| US-ARb | ARM Southern Great Plains burn site- Lamont | 35.55 | –98.04 | 2005 | 2006 | 15.3 | 645.9 | GRA |
| US-ARc | ARM Southern Great Plains control site- Lamont | 35.55 | –98.04 | 2005 | 2006 | 16.1 | 710.6 | GRA |
| US-ARM | ARM Southern Great Plains site- Lamont | 36.61 | –97.49 | 2003 | 2012 | 15.7 | 762.8 | CRO |
| US-Blo | Blodgett Forest | 38.90 | –120.63 | 1997 | 2007 | 11.1 | 1374.8 | ENF |
| US-Cop | Corral Pocket | 38.09 | –109.39 | 2001 | 2007 | 13.6 | 203.0 | GRA |
| US-GBT | GLEES Brooklyn Tower | 41.37 | –106.24 | 1999 | 2006 | 0.4 | 513.9 | ENF |
| US-GLE | GLEES | 41.37 | –106.24 | 2004 | 2014 | 0.0 | 1418.6 | ENF |
| US-Ha1 | Harvard Forest EMS Tower (HFR1) | 42.54 | –72.17 | 1991 | 2012 | 8.2 | 1189.5 | DBF |
| US-KS2 | Kennedy Space Center (scrub oak) | 28.61 | –80.67 | 2003 | 2006 | 21.8 | 1146.4 | CSH |
| US-Los | Lost Creek | 46.08 | –89.98 | 2000 | 2014 | 5.1 | 749.4 | WET |
| US-Me1 | Metolius - Eyerly burn | 44.58 | –121.50 | 2004 | 2005 | 12.4 | 1083.5 | ENF |
| US-Me2 | Metolius mature ponderosa pine | 44.45 | –121.56 | 2002 | 2014 | 9.1 | 171.1 | ENF |
| US-Me6 | Metolius Young Pine Burn | 44.32 | –121.61 | 2010 | 2014 | 7.5 | 486.0 | ENF |
| US-MMS | Morgan Monroe State Forest | 39.32 | –86.41 | 1999 | 2014 | 7.7 | 408.2 | DBF |
| US-Myb | Mayberry Wetland | 38.05 | –121.77 | 2010 | 2014 | 15.3 | 381.6 | WET |
| US-Ne1 | Mead - irrigated continuous maize site | 41.17 | –96.48 | 2001 | 2013 | 2.3 | 721.3 | CRO |
| US-Ne2 | Mead - irrigated maize-soybean rotation site | 41.16 | –96.47 | 2001 | 2013 | 10.5 | 846.1 | CRO |
| US-Ne3 | Mead - rainfed maize-soybean rotation site | 41.18 | –96.44 | 2001 | 2013 | 10.3 | 875.6 | CRO |
| US-NR1 | Niwot Ridge Forest (LTER NWT1) | 40.03 | –105.55 | 1998 | 2014 | 10.4 | 699.4 | ENF |
| US-ORv | Olentangy River Wetland Research Park | 40.02 | –83.02 | 2011 | 2011 | 12.4 | 1385.8 | WET |
| US-PFa | Park Falls/WLEF | 45.95 | –90.27 | 1995 | 2014 | 5.6 | 606.5 | MF |
| US-Prr | Poker Flat Research Range Black Spruce Forest | 65.12 | –147.49 | 2010 | 2013 | -3.2 | 266.8 | ENF |
| US-SRG | Santa Rita Grassland | 31.79 | –110.83 | 2008 | 2014 | 18.8 | 387.6 | GRA |
| US-SRM | Santa Rita Mesquite | 31.82 | –110.87 | 2004 | 2014 | 19.0 | 333.2 | WSA |
| US-Syv | Sylvania Wilderness Area | 46.24 | –89.35 | 2001 | 2014 | 4.4 | 665.4 | MF |
| US-Ton | Tonzi Ranch | 38.43 | –120.97 | 2001 | 2014 | 16.4 | 545.7 | WSA |
| US-Tw1 | Twitchell Wetland West Pond | 38.11 | –121.65 | 2012 | 2014 | 15.7 | 444.2 | WET |
| US-Tw2 | Twitchell Corn | 38.10 | –121.64 | 2012 | 2013 | 15.2 | 389.4 | CRO |
| US-Tw3 | Twitchell Alfalfa | 38.12 | –121.65 | 2013 | 2014 | 16.0 | 344.6 | CRO |
| US-Tw4 | Twitchell East End Wetland | 38.10 | –121.64 | 2013 | 2014 | 15.8 | 243.5 | WET |
| US-Twt | Twitchell Island | 38.11 | –121.65 | 2009 | 2014 | 14.7 | 359.4 | CRO |
| US-UMB | Univ. of Mich. Biological Station | 45.56 | –84.71 | 2000 | 2014 | 7.2 | 613.1 | DBF |
| US-UMd | UMBS Disturbance | 45.56 | –84.70 | 2007 | 2014 | 7.1 | 717.5 | DBF |
| US-Var | Vaira Ranch- Ione | 38.41 | –120.95 | 2000 | 2014 | 15.8 | 572.3 | GRA |
| US-WCr | Willow Creek | 45.81 | –90.08 | 1999 | 2014 | 5.5 | 693.1 | DBF |
| US-Whs | Walnut Gulch Lucky Hills Shrub | 31.74 | –110.05 | 2007 | 2014 | 17.6 | 287.8 | OSH |
| US-Wi0 | Young red pine (YRP) | 46.62 | –91.08 | 2002 | 2002 | 3.5 | 726.4 | ENF |
| US-Wi3 | Mature hardwood (MHW) | 46.63 | –91.10 | 2002 | 2004 | 5.2 | 667.6 | DBF |
| US-Wi4 | Mature red pine (MRP) | 46.74 | –91.17 | 2002 | 2005 | 5.7 | 703.3 | ENF |
| US-Wi6 | Pine barrens #1 (PB1) | 46.62 | –91.30 | 2002 | 2003 | 3.5 | 672.8 | OSH |
| US-Wi9 | Young Jack pine (YJP) | 46.62 | –91.08 | 2004 | 2005 | 4.0 | 754.6 | ENF |
| US-Wkg | Walnut Gulch Kendall Grasslands | 31.74 | –109.94 | 2004 | 2014 | 17.3 | 292.4 | GRA |
| ZA-Kru | Skukuza | –25.02 | 31.50 | 2000 | 2010 | 21.8 | 512.8 | SAV |
| ZM-Mon | Mongu | –15.44 | 23.25 | 2000 | 2009 | 22.3 | 582.2 | DBF |


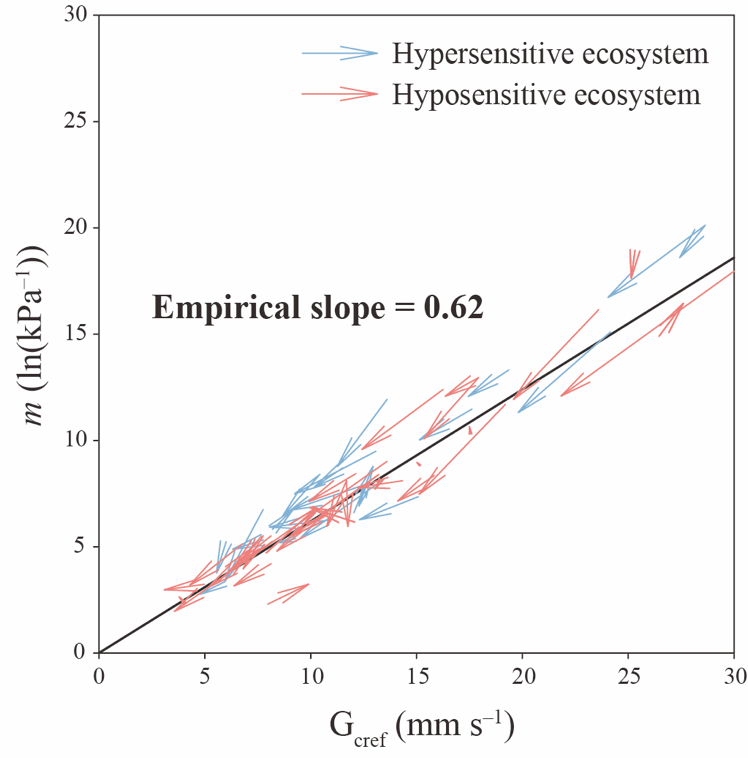


**Fig. S1** Vector plot illustrating the change of dGc/dln(VPD) (*m*) and reference canopy stomatal conductance (Gcref) in non-drought years and the drought year. The start and end of each vector represent the values of *m* and Gcref of multi-year mean in non-drought years and the drought year, respectively. The solid black line is the line with a slope of 0.62 that is the mean empirical ratio of *m* to Gcref across all study sites.


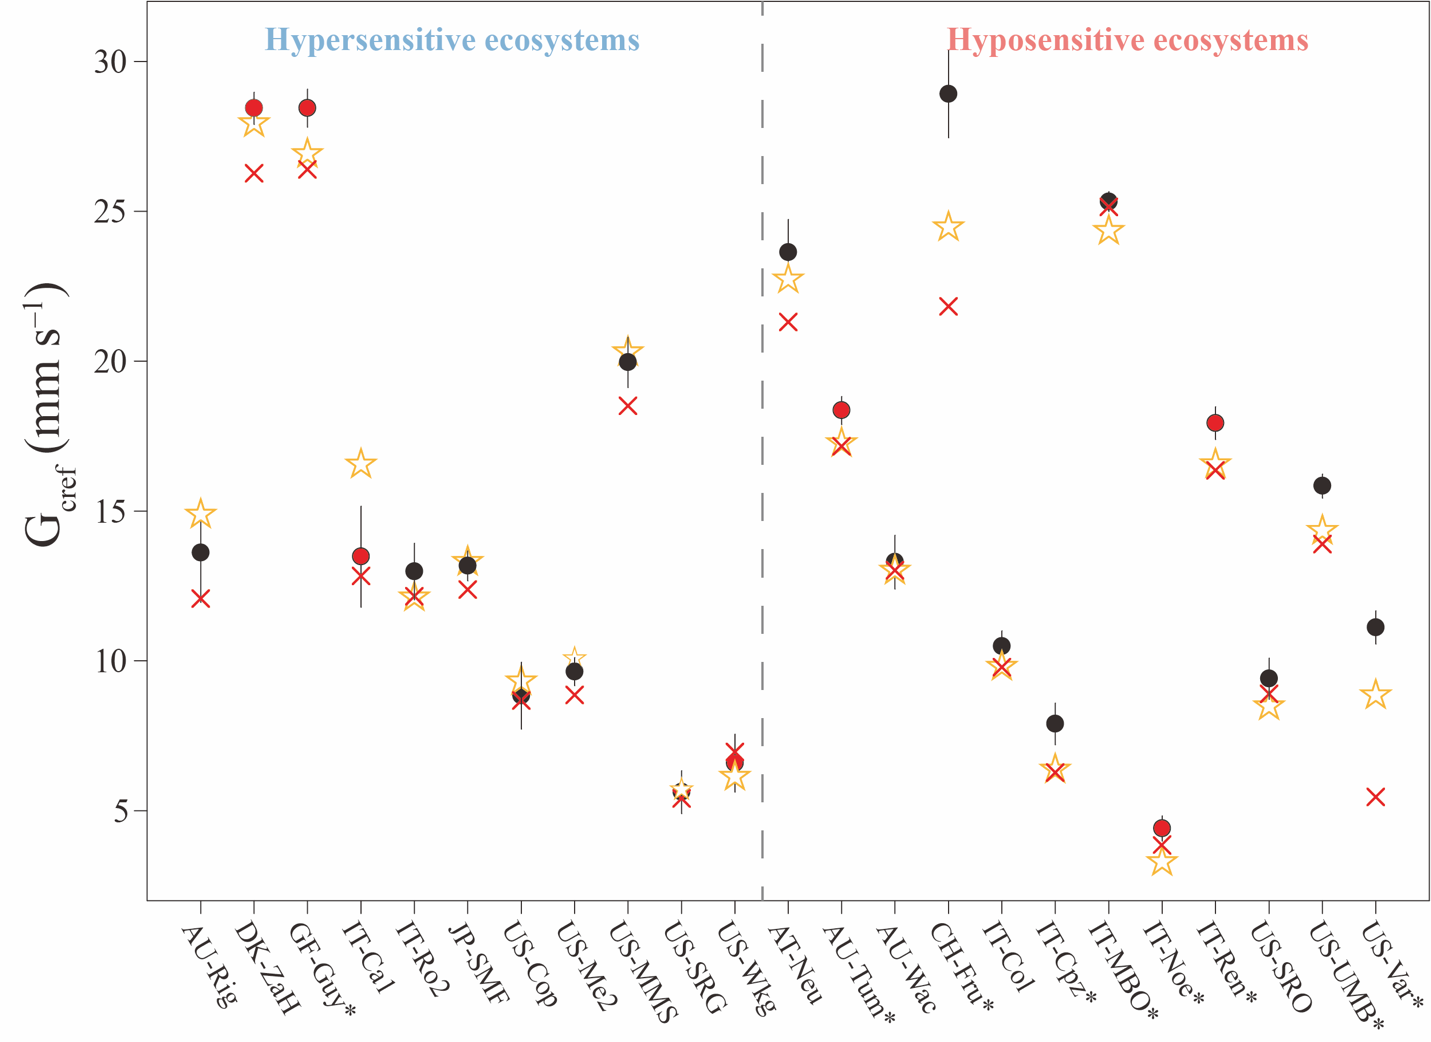


**Fig. S2** The mean reference canopy stomatal conductance (Gcref) of normal years (circle), the Gcref of the drought year (red cross), and the Gcref of the year following the drought year (orange star) for the selected sites. The error bar is the standard error of the mean Gcref during the study period in each site. "*" indicates the site where the Gcref of the year following the drought year was significantly less than the multi-year mean Gcref at a significance level of 0.05. The red circle represents the site experiencing extreme drought.


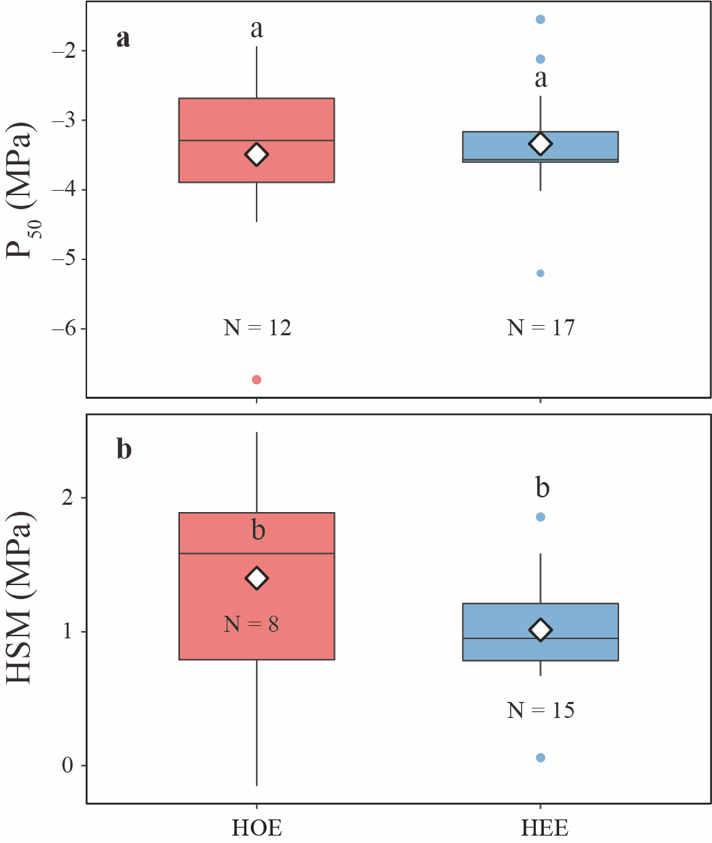


**Fig. S3** Boxplots showing P50 (a) and hydraulic safety margin (HSM, b) for hyposensitive ecosystems (HOE) and hypersensitive ecosystems (HEE). The black line in each box is the median, and the whiskers extending to the highest and lowest values are within 1.5 times the interquartile range (IQR) of the upper and lower quartiles, respectively. The diamond in each box is the mean value. The lowercases represent the significance of the difference in P50 or HSM between HOE and HEE at a significance level of 0.05. N is the number of sites. The two hydraulic parameters were not available for all flux sites, and only the sites with the data were plotted.


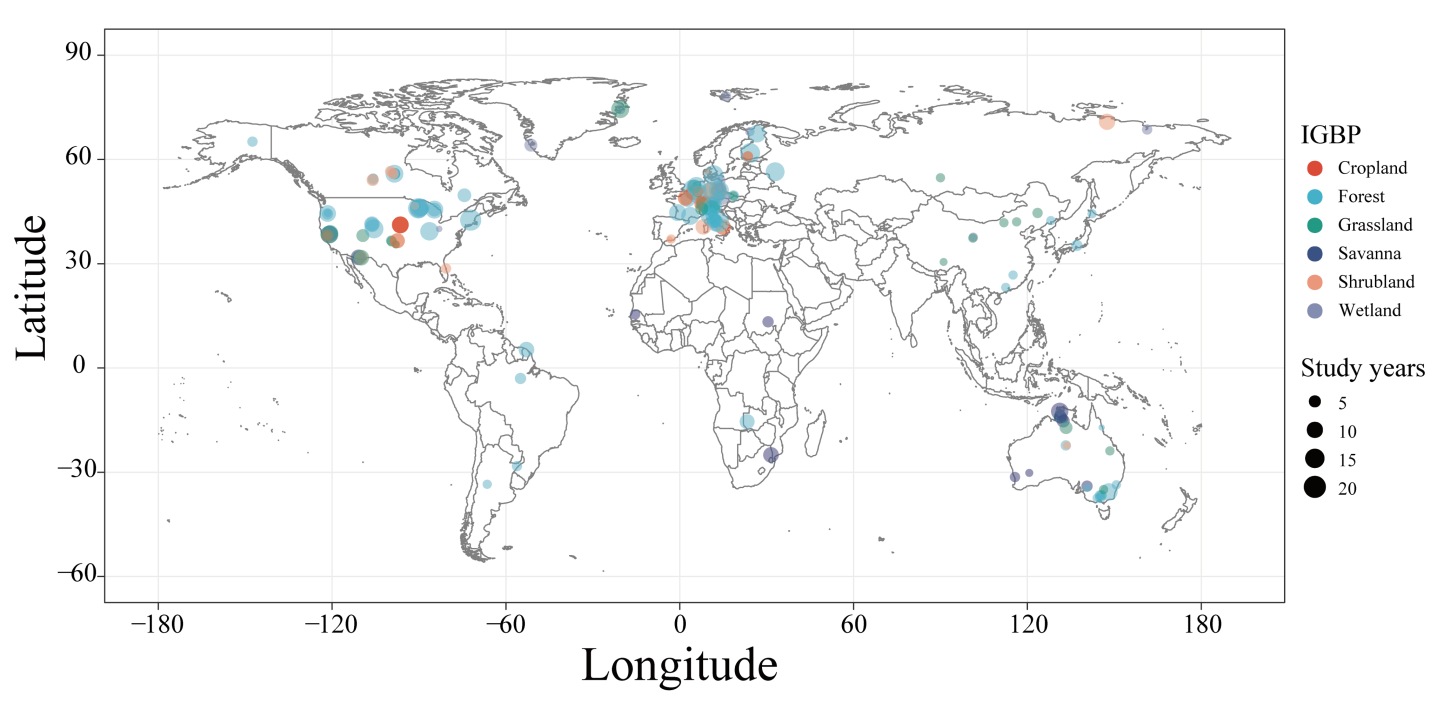


**Fig. S4** Map of site locations, ecosystem types, and study years across 165 FLUXNET sites.


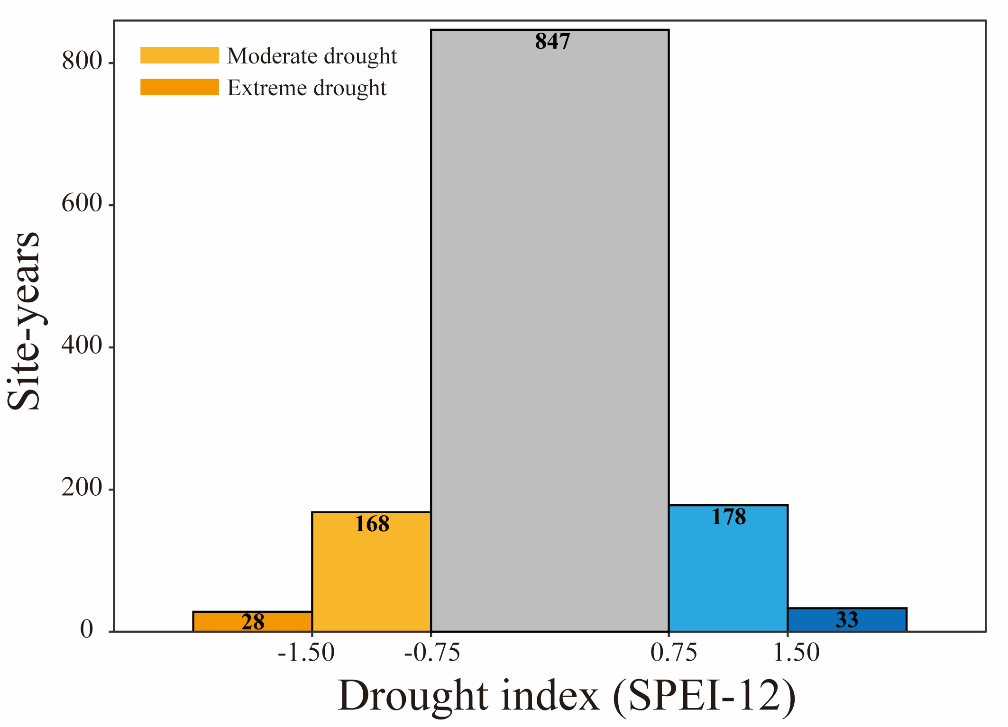


**Fig. S5** The classification of drought degree based on SPEI-12. The numbers in the bar indicate the number of site-years.

**
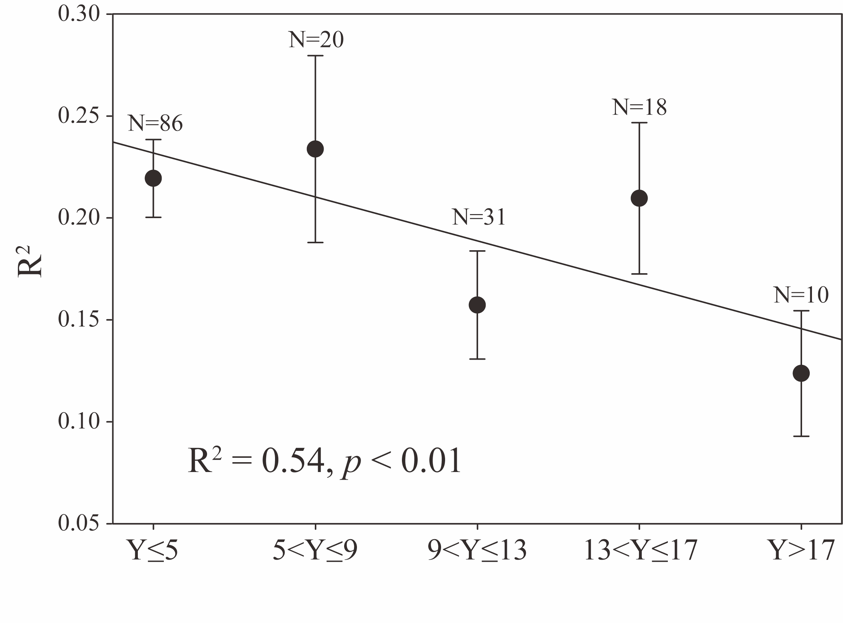
**

Fig. S6 The coefficient of determination (R2) between ecosystem water availability (α) and standardized precipitation evapotranspiration index (SPEI) at the annual scale in different ranges of the number of site years (Y). The error bar is the standard error. N above the bar is the number of sites in each range.
